# Supplementary material
Source: PubMed Central journal article supplement (PMC4152019)
Supplement: ijcep0007-4557-f13.pdf [file ijcep0007-4557-f13.pdf]

## Scoring of inflammation in IBD mouse models

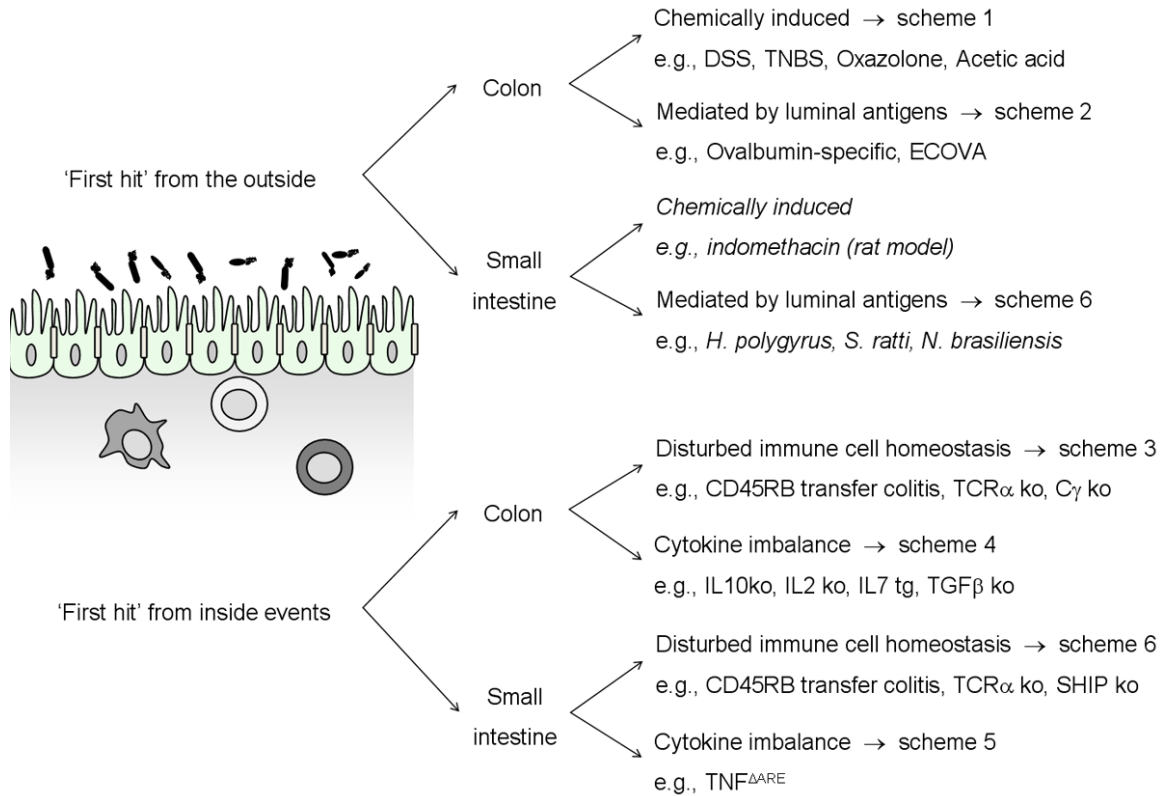

**Supplementary Figure 1.** DSS - dextran sodium sulfate; TNBS - 2,4,6-trinitrobenzene sulfonic acid; ECOVA - antibiotic-resistant *Escherichia coli* producing ovalbumin; *H. polygyrus* - *Heligmosomoides polygyrus*; *S. ratti* - *Strongyloides ratti*; *N. brasiliensis* - *Nippostrongylus brasiliensis*; TCR $\alpha$  ko - T cell receptor alpha knockout; C $\gamma$  ko - C $\gamma$  chain knockout; IL10 ko - interleukin-10 knockout; IL2 ko - interleukin-2 knockout; IL7 tg - interleukin-7 transgenic; TGF $\beta$  ko - transforming growth factor beta knockout; SHIP ko - Src homology 2-containing inositol-5-phosphatase knockout; TNF $\Delta$ ARE - deletion of the AU-rich elements (ARE) of tumor necrosis factor (TNF).  epithelial cell;  microbiota;  lymphocytes;  macrophage.
